# Supplementary material
Source: publisher figshare collection journal article supplement (https://acs.figshare.com/ndownloader/files/20039945)
Supplement: Supplementary file 1 [file 20039945]

*Supporting information*

**Evolutionary engineering of cyanobacteria to enhance the production of  $\alpha$ -farnesene from CO<sub>2</sub>**

Napisa Pattharaprachayakul<sup>1,2</sup>, Hyun Jeong Lee<sup>1</sup>, Aran Incharoensakdi<sup>2</sup>, Han Min Woo<sup>1\*</sup>

<sup>1</sup>Department of Food Science and Biotechnology, Sungkyunkwan University (SKKU), 2066 Seobu-ro, Jangan-gu, Suwon 16419, Republic of Korea

<sup>2</sup>Laboratory of Cyanobacterial Biotechnology, Department of Biochemistry, Faculty of Science, Chulalongkorn University, 254 Phayathai Road, Pathumwan, Bangkok 10330 Thailand

\*Corresponding author:

Han Min Woo

Department of Food Science and Biotechnology, Sungkyunkwan University (SKKU),

2066 Seobu-ro, Jangan-gu, Suwon 16419, Republic of Korea

Tel: +82 31 290 7808; Fax: +82 31 290 7882;

E-mail address: hmwoo@skku.edu (H. M. Woo)

ORCID: 0000-0002-8797-0477

**Table S1.** RBS sequences and oligonucleotides used for gene cloning in this study.

| Name  | Relevant characteristics (5' → 3')                                    | Source     |
|-------|-----------------------------------------------------------------------|------------|
| RBS-1 | <u>CAA</u> AagatctAATAAAGGAGGTTAAAGCTAT <b>Ggaattcgcgtgcacctgcag</b>  | This study |
| RBS-2 | <u>CAA</u> AagatctTAGCATCGAACATAGAGAGGTCAGACAT <b>Ggaattcgcgtgcac</b> | This study |
| RBS-3 | <u>CAA</u> AagatctTGTATTCGTAGGGTACAGTTTAT <b>Ggaattcgcgtgcacct</b>    | This study |
| RBS-R | TTGGATGCTCTTGAATTGCC                                                  | This study |

Note: The restriction enzyme sites were shown as lower cases. RBS and coding regions of AFS were underlined and bold letters, respectively.

**Table S2.** Oligonucleotides used for DNA sequencing.

| Name                     | Relevant characteristics (5' → 3') | Source     |
|--------------------------|------------------------------------|------------|
| <i>Promoter checking</i> |                                    |            |
| <i>Native MEP</i>        |                                    |            |
| dxs-proF                 | GGGTCGACAGACTGAGCCCA               | This study |
| dxs-proR                 | TGTCGTTGAGCACGACCAAC               | This study |
| dxr-proF                 | CGAGACCGGCCAAACCAG                 | This study |
| dxr-proR                 | CAGTTACTTGCGACAGCCGT               | This study |
| ispD-proF                | GCACTCAAATTCCAGCCTCC               | This study |
| ispD-proR                | GCTCAACGACGACATCAATC               | This study |
| ispE-proF                | CGCTTCCAGTTCTGGTTGTG               | This study |
| ispE-proR                | TTGGCCTTCGTAAAGTTGG                | This study |
| ispF-proF                | TGGGATCGAAACGTACGCTG               | This study |
| ispF-proR                | CGCCTCCTCCACGGACTGAT               | This study |
| ispG-proF                | CTCGCGCAGGCTGGTACTA                | This study |
| ispG-proR                | CTCAGAAGCCGATAAAGAC                | This study |
| ispH-proF                | CTTCCGCAGCTCCAAG                   | This study |
| ispH-proR                | GAGCTGGTGGCGACCGTCTC               | This study |
| idi-proF                 | CAACAAGCCCTTCGGCTCCA               | This study |
| idi-proR                 | TGCCTGTGAACGTCGGTACC               | This study |
| ispA-proF                | TCTGACGACCGATTTCGAC                | This study |
| ispA-proR                | CCTGGAATGGGTTGAGATG                | This study |
| <i>NSI</i>               |                                    |            |
| UP-pTrcI                 | CGACAGGTTTCCCGACTGGA               | This study |
| Pr_AFS-R1                | CAGCCGTTGCGCAGGTATTC               | This study |

*NSII*

Up-pTrcI CGACAGGTTTCCCGACTGGA This study

DXS-R1 TAAAGGCCAGGTGCAGGCGGG This study

*Gene checking*

*Native MEP*

7942\_dxs\_F ACGTTCACTGCAGCCAGCAG This study

7942\_dxs\_R CATGATCAGTCCAGGTCTTG This study

7942\_dxr\_F TCGCCTCCCTCGCTTCAGCA This study

7942\_dxr\_R TAGACCTCAGGCACATCGAT This study

7942\_ispD\_F ATCGGGGTAAGCTGAAGTC This study

7942\_ispD\_R GCACTCAAATTCCAGCCTCC This study

7942\_ispF\_F ATCTAGGCCACATGACGTCA This study

7942\_ispF\_R TGGGATCGAAACGTACGCTG This study

7942\_ispE\_F ATCAGATTGCGCCCGAAGC This study

7942\_ispE\_R GAGCTAGTGCTGGATGGGAT This study

7942\_ispG\_F TCGCCCAAGGGTTGGTCGAT This study

7942\_ispG\_R GCGAAAACCGCCTATCAGGA This study

7942\_ispH\_F GCAATTGGCGATCGCGGCTT This study

7942\_ispH\_R GTGGAGTCGAGAGTCACGAT This study

7942\_idi\_F CAGCACATGCCAGTTCAGAC This study

7942\_idi\_R GTTGGACCAATGACCGTGGC This study

7942\_ispA\_F GTCAAGCTGAAGGTGGGCAC This study

7942\_ispA\_R CGGTAGCGAAATAGCGATCG This study

*NSI*

DXS-F1 CGTGTCGCTCAAGGCGCACT This study

DXS-R1 TAAAGGCCAGGTGCAGGCGGG This study

idi-F1 AACCCGTGCCCGTGCTGA This study

idi-R1 TACACCAGAAAGGGGCGCAG This study

|             |                       |                    |
|-------------|-----------------------|--------------------|
| ispA-F1     | ATCGATGCCACCCCCTGGG   | This study         |
| ispA-R1     | AGCCGAACGCCCTAGGTATA  | This study         |
| <i>NSII</i> |                       |                    |
| PrHW882F    | TAATGTTTTTTTGCGCCGACA | FMB lab collection |
| PrHW883R    | TTGGATGCTCTTGAATTGCC  | FMB lab collection |
| Pr_AFS-F1   | CACCACTTTGCCACCTGAA   | This study         |
| Pr_AFS-R1   | CAGCCGTTGCGCAGGTATTC  | This study         |
| Pr_AFS-F2   | CTACCTGATCAACCAGCGCC  | This study         |
| Pr_AFS-R2   | CATCGCCATCTTTGTACAGG  | This study         |

---

**Figure S1.** A Scheme of 96-well based screening and sample preparation for analyzing mutants generated from error-prone PCR.

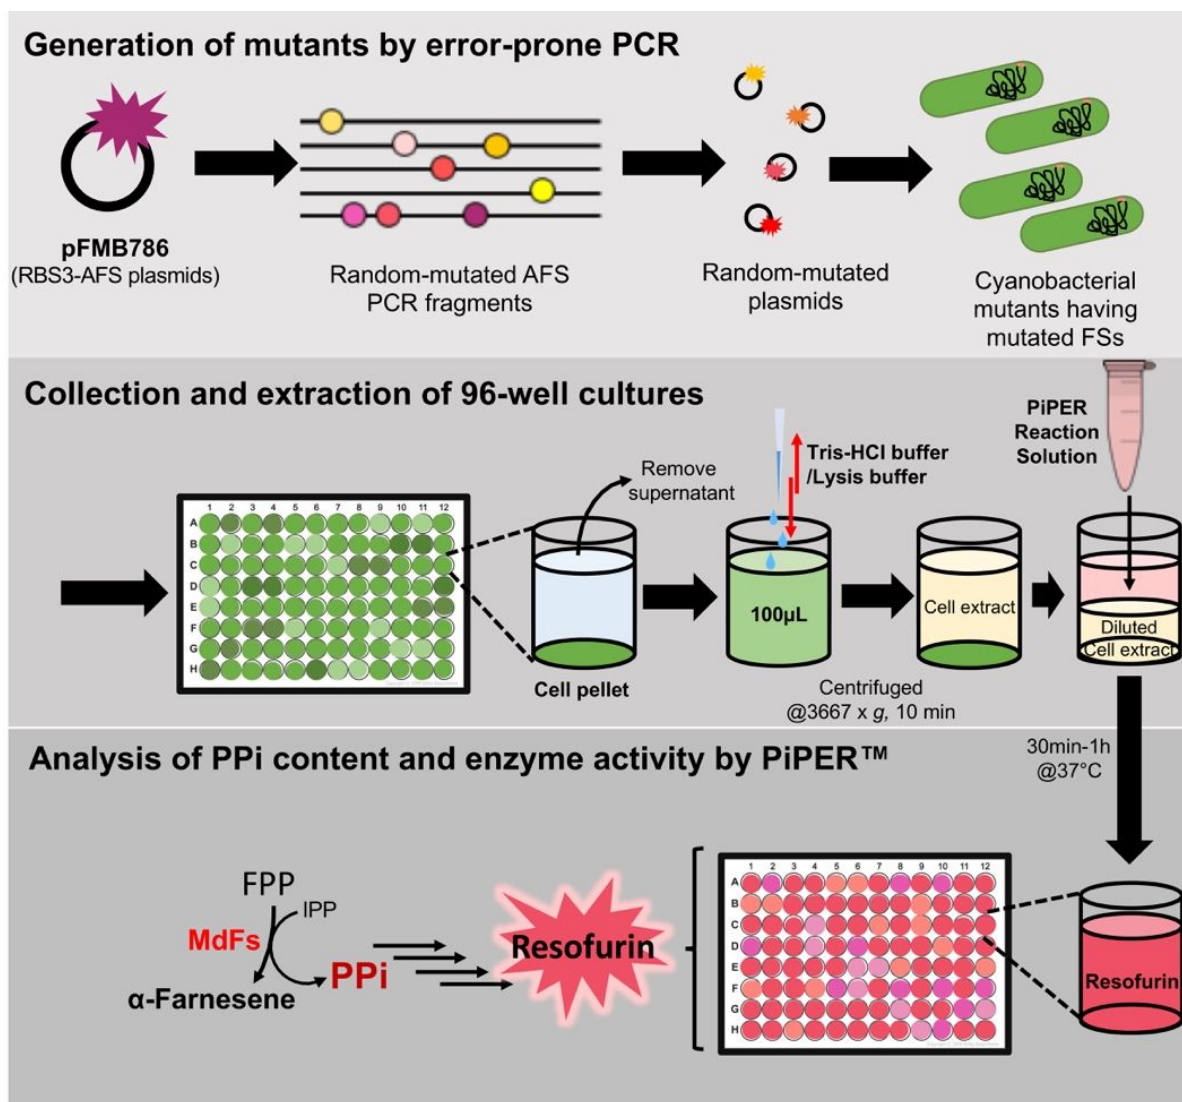

**Generation of mutants by error-prone PCR.** The template used in error-prone PCR was pFMB786 (described in Table 1). Error-prone PCR was performed by using GeneMorph® II Random Mutagenesis Kit (Agilent) and following its manual instruction, which high- and low-rate of mutation were obtained from 25 and 500 ng of initial template, respectively. Randomly mutated

PCR libraries were cut and ligated with pSe2Bb1k plasmid backbone before transformed into *E. coli* DH10 $\beta$ . Randomly-mutated plasmids were continually collected and transformed into SeHL33. The colonies selection was done with cultivation on BG-11 supplemented with spectinomycin and kanamycin.

**Collection and extraction of 96-well cultures.** Each selective colony was inoculated in 96-well microplate along with controls until reaching  $OD_{730} > 1$  and then transferred 100  $\mu$ L of culture to new 96-well plates (Clear 96-Well Plate, Greiner Bio-One) containing BG-11 with 1 mM IPTG addition. Preparation of samples before fluorescence screening was firstly collecting cell pellets and then removing supernatants. Cell pellets were then washed and lysed by mixing with pH 7.5 Tris-HCl and lysis buffer (B-PER<sup>TM</sup>, Thermo Science) respectively. Diluted cell extracts from day-3 and -8 after induction were transferred to new 96-well plate ( $\mu$ Clear<sup>®</sup> 96 Well Plate, Greiner Bio-One) for PPi signal detection and  $OD_{730}$  measurement.

**Analysis of PPi content and enzyme activity by PiPER<sup>TM</sup>.** PiPER<sup>TM</sup> reaction solution must be prepared fresh before use (described in the instruction) and added into 96-well plate containing cell extracts (with 100  $\mu$ L in total volume). The reaction was run for 30 – 60 min at 37°C in microplate reader. Resofurin fluorescence was measured and calculated at 560 nm with 590 nm excitation wavelength. Note that the enzyme activity assay is described in second part of instruction.
